# Supplementary material for: Genome-Wide Identification and Characterization of the Polyamine Uptake Transporter (Put) Gene Family in Tomatoes and the Role of Put2 in Response to Salt Stress
Source: MDPI journal article supplement (doi:10.3390/antiox12020228), 2023-01-18
Supplement: s1 [file s1]

**Table S1 Primer sequences used for vector construction**

| Vector                         | Gene               | Forward primers (5'-3')                             | Reverse primers (5'-3')                              |
|--------------------------------|--------------------|-----------------------------------------------------|------------------------------------------------------|
| <b>pYES2</b>                   | <i>Put1</i>        | gggaatattaagcttggtaccATGGGGGAGTTCGATGATGG           | gcggccgttactagtggatccACGAAGTAAAGGTTTCATGTGTTGTAAT    |
|                                | <i>Put2</i>        | gggaatattaagcttggtaccATGACAGTAAAATCAGAAACAAAATCC    | gcggccgttactagtggatccTCAATGAACTAATGTTCCATTATCGC      |
|                                | <i>Put3</i>        | gggaatattaagcttggtaccATGACTGAGCTTAGCTCTCCGAA        | gcggccgttactagtggatccTACTCCATCAGGTTTGGTAGGTG         |
|                                | <i>Put4</i>        | gggaatattaagcttggtaccATGGCAGAGGAGAAGCAAACAC         | gcggccgttactagtggatccCTATGTTATAGTCATCTCTTCCATATCATCA |
|                                | <i>Put5</i>        | gggaatattaagcttggtaccATGGTGAATGATATTAAGAAAAACCCA    | gcggccgttactagtggatccCTAATCCACTGATGAAATTTCTGTG       |
|                                | <i>Put6</i>        | gggaatattaagcttggtaccATGACACAAATGATTGAGAC           | gcggccgttactagtggatccTACTCAATATATGTATCAT             |
|                                | <i>Put7</i>        | gggaatattaagcttggtaccATGTTCAATGAAGAAAGAGG           | gcggccgttactagtggatccTCAGTCAAGATAAACTTTGATG          |
|                                | <i>Put8</i>        | gggaatattaagcttggtaccATGGGAGTTATCGCGCTTCCT          | gcggccgttactagtggatccCTATATATGTAGTAGGTTCT            |
| <b>pFGC1008-HA</b>             | <i>Put2</i>        | ttacaattaccatggg'gcgcgccATGACAGTAAAATCAGAAACAAAATCC | aacatcgtaggtaggtaccATGAACTAATGTTCCATTATCGC           |
| <b>CRISPR/Cas9-<i>put2</i></b> | <i>sgRNA1-Put2</i> | TCGCCAACCACCTCGTGGGC                                | TCGCCAACCACCTCGTGGGC                                 |
|                                | <i>sgRNA2-Put2</i> | TACTGGGGCTTTCAACAAGG                                | CCTTGTTGAAAGCCCCAGTA                                 |

**Table S2 Primer sequences used for qRT-PCR analysis**

| Gene             | Forward primers (5'-3') | Reverse primers (5'-3') |
|------------------|-------------------------|-------------------------|
| <i>Put1</i>      | AGCTGCAGCGTCAAATATGG    | CCCTCTCTGCCATACCAAGT    |
| <i>Put2</i>      | GGGATCCTCCTCTCAGCTTC    | ACACAGTACAATGGCTCCGA    |
| <i>Put3</i>      | GGGAATGCTCCCTGAGTTCT    | ACACCAGAAGCCGAGAAGAT    |
| <i>Put4</i>      | GGCAGAGGAGAAGCAAACAC    | CAGATTGAACGGCTGGTTCT    |
| <i>Put5</i>      | GCTGCTGCTGCAATGTCTAA    | TCCGGTTGCAGAGCATAAGA    |
| <i>Put6</i>      | CAACGCGATTGGGATACAGG    | TGGTAGACAACACAGCACCA    |
| <i>Put7</i>      | ATGCAAACAGGTTGCCGTAG    | GACAGACAAGCATGCAGGAA    |
| <i>Put8</i>      | TTTCGCAAAGAGATGGCGTT    | AAGGTCTTGATGCTGCTGGA    |
| <i>ADC1</i>      | CATCCAGTGATTTGCAGCGA    | GTAAACCACCCGAAGATGGC    |
| <i>ADC2</i>      | GTCGGATATGGCCTTCAGGA    | CTTCACGTTCTTCCGGTCAC    |
| <i>SPDS1</i>     | AACTCACAGAGCGGGATGAA    | AAGAATGCCGAGACACCTCA    |
| <i>SPDS2</i>     | TATCTACGCAGGCTGAGAGC    | AGGTCCCTCAGTAGAGCAGA    |
| <i>SPDS3</i>     | ATGGGGCCAGTGTTCTTACAT   | AGAGCGCCCTCTAACTTCTC    |
| <i>SPDS4</i>     | GCCATCACAAATCACCACCAA   | ACCTGGCCATAACGCACTAA    |
| <i>ODC1</i>      | GCTCAACTCGGAATGCCAAA    | CTCAGGGAAGTCGTGGAAGT    |
| <i>ODC2</i>      | GGAGCATTGCCGGAAGAAAT    | TCGCTTGGCGATAAATGGTG    |
| <i>SPMS1</i>     | TATCTACGCAGGCTGAGAGC    | AGGTCCCTCAGTAGAGCAGA    |
| <i>SPMS2</i>     | TATCTACGCAGGCTGAGAGC    | AGGTCCCTCAGTAGAGCAGA    |
| <i>SPMS3</i>     | CAATGGCACCATCAACACCA    | ACCTTCCCATACGTTGCTGA    |
| <i>PAO1</i>      | CCTCTGTGATCATCGTCGGA    | CTACTCCGCCGAATTCCTCT    |
| <i>PAO2</i>      | TTGCTGCAGATGCTGATTCC    | ATCCAAGCGAATGTCAAGCC    |
| <i>PAO3</i>      | AGTCTCAAAGGTTGGCGAGA    | CAGCAAACCAGCCTTCCATT    |
| <i>PAO4</i>      | GCAGAATGGAGGCATGGTTT    | CCATCCGTAATCGCCTTCAC    |
| <i>PAO5</i>      | GCATGCAGACTCAGCCATCA    | ACTTGAGCCAACTGCCACAT    |
| <i>Cu/Zn-SOD</i> | CTCCTGGAGATGAAATCCGT    | AAGTGCTCGTCCAACAACCTG   |
| <i>MDAR</i>      | TCCGAACAAACATACCTGGA    | CGTGTGTGCAGTTAGCAATG    |
| <i>DHAR</i>      | CCCTGATGTCCTTGGAGACT    | AAGAACCATTGTTGGCTGTGTC  |
| <i>APX</i>       | GACTCTTGAGGCCATTAGG     | AGGGTGAAAGGGAACATCAG    |
| <i>GR</i>        | TCTGATGCTGCCCTTGA       | GCGACTCCTCGGTATGG       |
| <i>CAT1</i>      | TGATCGCGAGAAGATACCTG    | CTTCCACGTTTCATGGACAAC   |
| <i>POD</i>       | GATGCAGTTGTGGCTACGGA    | GGGCACCTGATAGAAGGACC    |
| <i>GPX</i>       | CCGGAACAAATGAGGAGATT    | TCCACAAGGAATTTGGTGAA    |
| <i>GAD1</i>      | AAACTTCCCATTTCCTCAACC   | CGATTGATCGGAGGAGAAAA    |
| <i>GAD2</i>      | CTTTGATCTTCTCCGTCGTTG   | ATATCGAGACGCGAAAGTCG    |
| <i>GAD3</i>      | CAGGACGTTTCAATATAATC    | CCTACGGAGGGTCTCAGAG     |
| <i>SOS1</i>      | TCGAGTGATGATTCTGGTGG    | GAGCCTTTCACACTGTGAT     |
| <i>SOS2</i>      | TCTATCCGCTTTGTTTG       | ATTGACCAGCCCTATTT       |
| <i>SOS3</i>      | CCACCCAAATGCACCAGTAG    | CAGCGCCAAAACCATCTCTT    |
| <i>NHX1</i>      | GTGGTGTGTTGGGCTGAT      | TTGCTCGTTAGTGAGAAGTG    |
| <i>NHX2</i>      | CCTTTGAGGGGAACAATGG     | CATCTTCATCTTCGTCTCC     |
| <i>NHX3</i>      | CTCAAGAGTCACCACCAAGCA   | CCAACCAAAAACAAGACCCAACA |
| <i>Actin</i>     | TGGTCGGAATGGGACAGAAG    | CTCAGTCAGGAGAACAGGGT    |
