# Supplementary material for: Genome-Wide Identification and Characterization of the Polyamine Uptake Transporter (Put) Gene Family in Tomatoes and the Role of Put2 in Response to Salt Stress
Source: MDPI journal article supplement (doi:10.3390/antiox12020228), 2023-01-18
Supplement: s1 [file s1]

**Genome-wide identification and characterization of polyamine uptake transporter (Put) gene family in tomato and the role of Put2 in response to salt stress**

**Supplemental data**

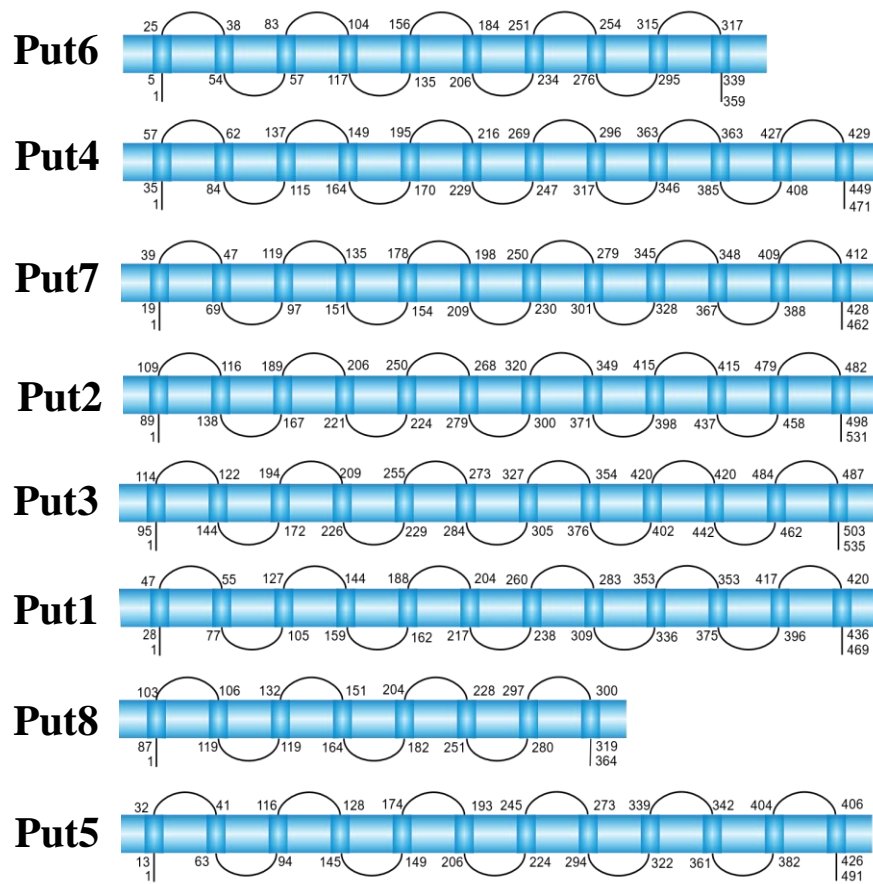

**Figure S1.** Cartoon of the predicted topology of tomato Put proteins. Transmembrane domains are indicated as blue rectangle.

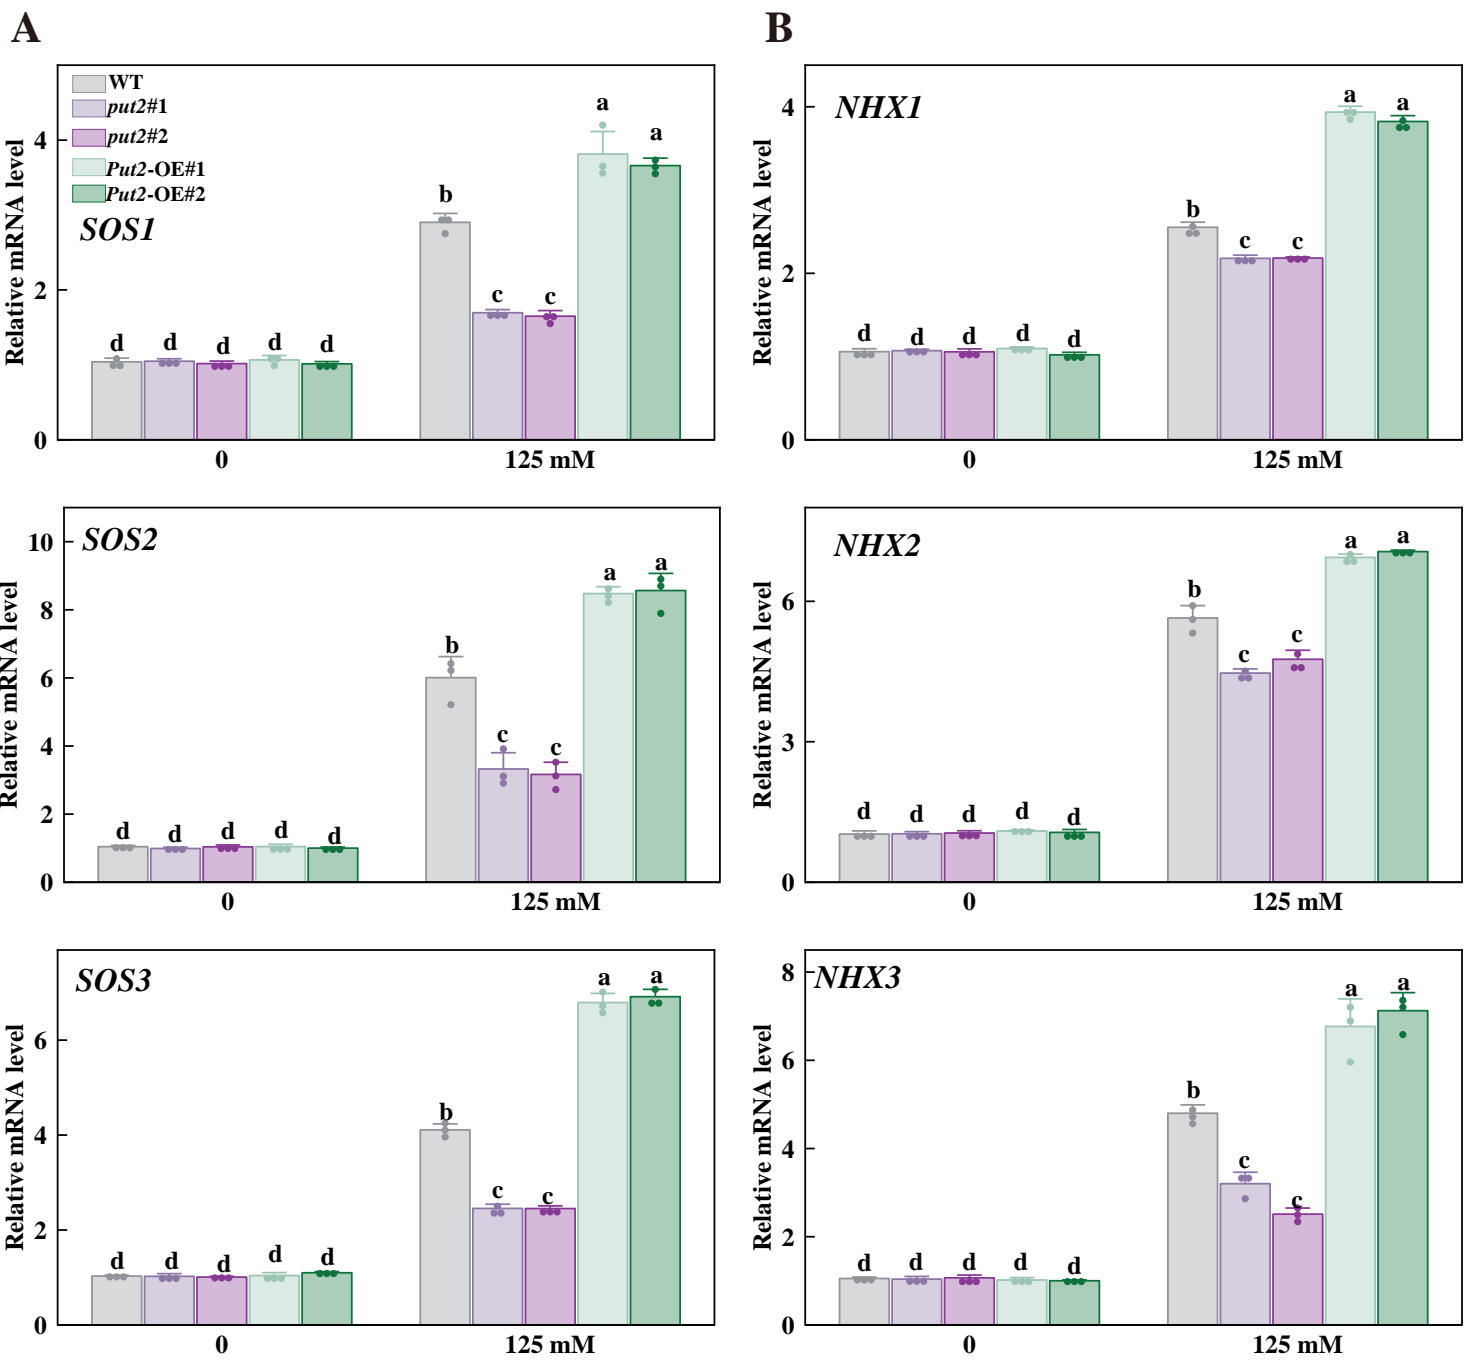

**Figure S2.** Relative transcript levels of *SOS1*, *SOS2* and *SOS3* (A), *NHX1*, *NHX2* and *NHX3* (B) gene expression in WT, *put2* mutants, or *Put2* OE lines after exposure with or without salt stress for 7 days. Data are presented as mean values $\pm$ SD; n=3. Different letters indicate significant differences between treatments ( $P<0.05$ , Duncan's multiple range test). At least three independent experiments were performed.

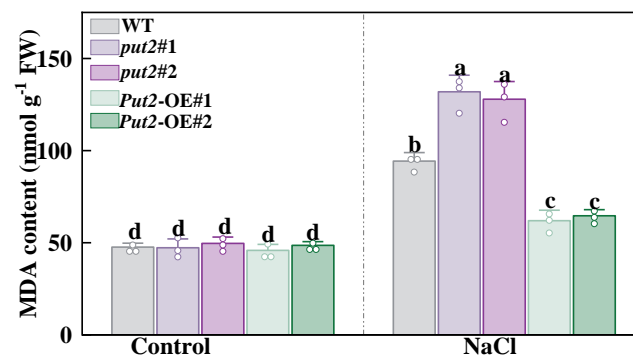

**Figure S3.** The MDA content in WT, *put2* mutants, or *Put2* OE lines after exposure with or without salt stress for 7 days. Data are presented as mean values $\pm$ SD; n=3. Different letters indicate significant differences between treatments ( $P<0.05$ , Duncan's multiple range test). At least three independent experiments were performed.
